## Epidural Morphine in Children: Pharmacokinetics and CO<sub>2</sub> Sensitivity

Jérôme Attia, M.D.,\* Claude Ecoffey, M.D.,† Pierre Sandouk, Ph.D.,‡  
Jeffrey B. Gross, M.D.,§ Kamran Samii, M.D.¶

The effects of epidural morphine (50  $\mu\text{g} \cdot \text{kg}^{-1}$ ) after abdominal and urologic surgery were studied in 20 children ranging in age from 2 to 15 yr and weighing between 9 and 54 kg. The onset and the duration of analgesia were  $30 \pm 12$  min and  $19.5 \pm 8$  h, respectively (mean  $\pm$  SD). Side effects were pruritus (4/20), nausea and vomiting (8/20), and urinary retention (4/14). No apnea was observed. Ventilation control was studied in seven children. No significant change in resting respiratory variables occurred after both surgery and epidural morphine injection. However, the slope of the ventilatory response to CO<sub>2</sub> was significantly ( $P < 0.05$ ) decreased after surgery but before morphine, as compared with its preoperative control value ( $0.84 \pm 0.44$  versus  $1.51 \pm 0.72 \text{ l} \cdot \text{min}^{-1} \cdot \text{mmHg}^{-1}$ ), and remained low for 22 h after epidural morphine ( $0.90 \pm 0.57 \text{ l} \cdot \text{min}^{-1} \cdot \text{mmHg}^{-1}$ ). Sixty minutes after morphine injection, the plasma morphine concentration was always less than  $12 \text{ ng} \cdot \text{ml}^{-1}$  in the seven children studied. Pharmacokinetic parameters were similar to those observed after epidural injection of morphine in adults, except for a shorter terminal half-life ( $73.8 \pm 41.6$  min) attributed to a greater total body clearance of morphine in the children ( $28.3 \pm 3.4 \text{ ml} \cdot \text{min}^{-1} \cdot \text{kg}^{-1}$ ). It is concluded that epidural morphine provides effective and prolonged analgesia in children after abdominal and urologic surgery and that it is associated with prolonged respiratory depression that requires close monitoring for at least 24 h. (Key words: Analgesics, narcotic: morphine. Anesthesia: pediatric. Anesthetics, intravenous: morphine. Anesthetic techniques: epidural. Pain: postoperative. Pharmacokinetics: epidural morphine. Ventilation: carbon dioxide response.)

EPIDURAL NARCOTICS ARE being used with increasing frequency to provide pain relief in adults<sup>1,2</sup> and in children<sup>3-5</sup> after major surgical procedures. Epidural morphine in adults induces respiratory depression as a result of the rostral spread of morphine in the cerebrospinal fluid (CSF)<sup>6,7</sup> but no information on the respiratory effect of epidural morphine is available in children. The pharmacokinetics of epidural morphine have been re-

ported in adults<sup>8,9</sup> but not in children. The present study evaluates, in children, the pharmacokinetics, duration of analgesia, occurrence of nonrespiratory side effects, and ventilatory response to CO<sub>2</sub> after epidural morphine given for postoperative pain relief.

### Methods

#### PATIENTS

Twenty ASA I or II children, aged  $6.4 \pm 5.4$  yr (mean  $\pm$  SD) (range 2-15 yr), weighing  $21.9 \pm 13.9$  kg (range 9-54 kg), were studied. No patient had abdominal pain before surgery. None was receiving narcotics before the operation. The investigation was approved by the Human Investigation Committee, and parental consent was obtained. The children were scheduled to undergo elective abdominal or urologic surgery (nephrectomy, pyeloplasty).

#### PROCEDURE FOR ALL THE PATIENTS STUDIED

All patients had fasted 6 h before anesthesia. They were premedicated orally with diazepam prepared in a liquid form ( $0.33 \text{ mg} \cdot \text{kg}^{-1}$  up to 10 mg) 1 h before induction of anesthesia, and with atropine ( $0.01 \text{ mg} \cdot \text{kg}^{-1}$ ) iv in the induction room. A cardiometer triggered by the ECG continuously recorded heart rate. Following induction of anesthesia with thiopental ( $10 \text{ mg} \cdot \text{kg}^{-1}$ ) over a 1-min period in order to obtain a prolonged sedation and orotracheal intubation performed after administration of pancuronium bromide ( $0.1 \text{ mg} \cdot \text{kg}^{-1}$ ), a 20 gauge epidural catheter was placed using a midline approach at the L2-L3 ( $n = 12$ ) or T9-T10 ( $n = 8$ ) interspace using a 18 gauge Tuohy needle and a loss of resistance technique. After an aspiration test, 1 or 2 ml of 2% lidocaine with epinephrine 1:200,000 was injected to identify an accidental vascular or dural puncture. Luer Lock<sup>®</sup> adapters with bacteriostatic filters were connected to the free ends of the catheters. A 22 gauge radial artery catheter (inserted in patients with surgery at high risk of rapid blood loss) or automated blood pressure cuff allowed continuous monitoring of arterial pressure. Anesthesia was maintained with 60% N<sub>2</sub>O in O<sub>2</sub>, isoflurane (1-1.5%) and pancuronium bromide ( $0.025 \text{ mg} \cdot \text{kg}^{-1}$  every 90 min). Ventilation was controlled mechanically, and no narcotics were used. The duration of the operation was  $138 \pm 72$  min (range 80-300 min), and the volume of dextrose in

\* Resident in Anesthesiology, Hôpital Bicêtre, Kremlin Bicêtre.

† Assistant Professor of Anesthesiology, Hôpital Bicêtre, Kremlin Bicêtre.

‡ Assistant in Pharmacology, Hôpital Fernand Widal, Paris.

§ Assistant Professor of Anesthesiology, Philadelphia Veterans Administration Medical Center, Philadelphia, Pennsylvania.

¶ Professor of Anesthesiology, Hôpital Bicêtre, Kremlin Bicêtre.

Received from the Department of Anesthesiology of Bicêtre Hospital, Université Paris-Sud, 94270 Kremlin Bicêtre; of Philadelphia Veterans Administration Medical Center, University of Pennsylvania, Philadelphia, Pennsylvania; and the Laboratory of Toxicology, INSERM U26, Fernand Widal Hospital, 75020 Paris. Accepted for publication July 1, 1986. Presented in part at the Annual Meeting of the American Society of Anesthesiologists, San Francisco, October 1985.

Address reprint requests to Dr. Ecoffey: Département d'Anesthésiologie, Hôpital Bicêtre, 94270 Kremlin Bicêtre, France.

lactated Ringer's solution infused was  $9 \pm 4 \text{ ml} \cdot \text{kg}^{-1} \cdot \text{h}^{-1}$ . At the end of surgery, inhalation anesthesia was discontinued and neuromuscular blockade was assessed by the head-lift test and reversed if necessary. The patients were extubated and taken to the recovery room where they remained during the first postoperative day. When grade 2 pain (as defined in table 1) occurred (mean time for the onset of pain was  $70 \pm 15 \text{ min}$ , range 45 min to 2 h),  $50 \mu\text{g} \cdot \text{kg}^{-1}$  of preservative-free morphine in 2 ml of isotonic saline solution was injected in the epidural catheter. The children remained in a  $30^\circ$  head-up position and the following data were collected: 1) quality, onset, and duration of analgesia (table 1); and 2) presence of nonrespiratory side effects such as nausea, pruritus, and urinary retention.

#### PLASMA MORPHINE ANALYSIS

The pharmacokinetics of morphine following epidural administration was studied in seven of the 20 children aged  $9.1 \pm 4.4 \text{ yr}$ , weighing  $29.0 \pm 13.7 \text{ kg}$ , who were free of cardiac, hepatic, or renal disease. Arterial blood gases were measured just before morphine administration. Arterial blood samples (3 ml) were collected before and 2, 10, 15, 30, 60, 120, 180, 240, 300, 360, and 540 min after epidural injection of morphine. Plasma was separated, stored at  $-20^\circ \text{ C}$  and assayed in duplicate by a highly specific radioimmunoassay (RIA) with a sensitivity of  $0.1 \text{ ng} \cdot \text{ml}^{-1}$ .<sup>10</sup> Morphine antisera were raised in goats by immunization with the N-carboxymethylnormorphine conjugated to bovine serum albumin as described by Gintzler *et al.*<sup>10</sup> The carrier protein was conjugated to the nitrogen atom of the opiate alkaloid in order to recognize the phenolic-hydroxy group on C3 and the alcoholic group on C6. The coefficient of variation for reproducibility varied from 7.7 to 12.0% at concentration ranging from 0.1 to 60 ng/ml. The specificity of the RIA was assessed by measuring the percentage of cross-reactivity of various congeners that inhibit labeled hapten-antibody complex at 50%. The cross-reactivity of morphine 3-O-glucuronide and of codeine were below 0.2%. 6-Monoacetylmorphine, an analogue of 6-O-glucuronide, had 0.5% of cross-reactivity. The sensitivity was high: 16 pg of morphine could be reliably assayed with  $^3\text{H}$ -morphine (60 Ci/mmol)\*\* as labeled antigen. A noncompartmental method was used to compute the pharmacokinetic parameters. Assuming a bioavailability of 100%, terminal rate constant ( $\beta$ ), and terminal half-life ( $t_{1/2\beta}$ ) were computed by linear regression of the observed terminal curve. Area under the curve (AUC) was calculated by the trapezoidal rule and extrapolated to infinity. Total body clearance (Cl<sub>t</sub>) was calculated as  $\text{Cl}_t = \text{dose}/\text{AUC}$  and apparent volume of distribution ( $V_\beta$ ) as  $V_\beta = \text{Dose}/$

TABLE 1. Criteria for Analgesia

|                                                                             |
|-----------------------------------------------------------------------------|
| Assessment of pain                                                          |
| Grade 0: calm, no pain expressed verbally                                   |
| Grade 1: pain expressed if questioned, but appeared to be comfortable       |
| Grade 2: pain expressed verbally spontaneously, with crying or restlessness |
| Onset of analgesia                                                          |
| Time from epidural morphine to no pain                                      |
| Duration of analgesia                                                       |
| Time from onset of analgesia to moderate pain                               |

AUC  $\cdot \beta$ . Time to maximum concentration ( $t_{\text{max}}$ ) and plasma maximum concentration ( $C_{\text{max}}$ ) were the mean of individual data. Results are expressed as mean  $\pm$  SD.

#### VENTILATORY MEASUREMENTS

Ventilation was studied in seven of the 20 children, aged  $10.1 \pm 2.6 \text{ yr}$ , weighing  $31.7 \pm 8.6 \text{ kg}$ . All the children studied had a median upper abdominal incision and a lumbar epidural catheter. Tidal volume ( $V_T$ ), respiratory rate (RR), and minute ventilation ( $\dot{V}_E$ ) were recorded when they were breathing room air and during  $\text{CO}_2$  re-breathing with either a mouthpiece and a nose-clip or a face-mask and a pneumotachograph (Fleisch® n° 1 for children younger than 8 yr, Fleisch® n° 2 for children equal to or older than 8 yr) and a Rudolph® nonrebreathing valve. Instrument dead space was 45 ml in the children younger than 8 yr and 70 ml in the children older than 8 yr. Ventilatory response to  $\text{CO}_2$  was assessed by re-breathing for 4–5 min from a 3–5 l spirometer filled with a mixture of  $\text{CO}_2$  (7%) in oxygen. Volume was measured by electronically integrating the flow signal obtained from a Godart® 17212 differential pressure transducer (Bilthoven, Holland) connected to the pneumotachograph, which was previously calibrated with a 1-l syringe of air. End-tidal  $\text{CO}_2$  tension ( $\text{PET}_{\text{CO}_2}$ ) was measured with a Godart® capnograph (Bilthoven, Holland) calibrated before and after each measurement with 5% and 7%  $\text{CO}_2$  in  $\text{O}_2$ . Calibration gases verified to be within 1% using Sholander microanalysis. All signals were recorded on a Gould® ES 1000 recorder using a paper speed of  $10 \text{ mm} \cdot \text{s}^{-2}$ . Linear regression of  $\dot{V}_E$  on  $\text{PET}_{\text{CO}_2}$  for each  $\text{CO}_2$  response curve yielded a slope ( $\dot{V}_E/\text{PET}_{\text{CO}_2}$ ). The  $\dot{V}_E$  at  $\text{PET}_{\text{CO}_2}$  55 mmHg ( $\dot{V}_E$  55) was calculated. Duplicate  $\text{CO}_2$  response curves were performed the day before surgery and, postoperatively, just before the injection of morphine, when pain grade 1 occurred, and 3, 6, 10, and 22 h after the injection.

#### STATISTICAL ANALYSIS

All values are expressed as mean  $\pm$  SD. Statistical analysis consisted of analysis of variance followed by Newman-

\*\* N.E.N., Boston, Massachusetts 02118.

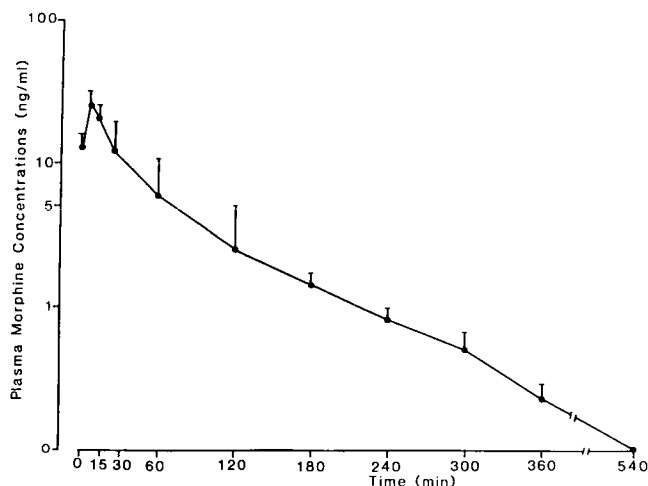

FIG. 1. Mean values ( $\pm$ SD) for plasma morphine following administration of  $50 \mu\text{g} \cdot \text{kg}^{-1}$  into the epidural space in seven children.

Keul's test. Statistical significance was indicated by  $P < 0.05$ .

## Results

### ANALGESIA AND SIDE EFFECTS

The onset of analgesia (defined as the absence of pain) occurred  $30 \pm 12$  min (range 15–40 min) after epidural morphine administration, and its duration was  $19.5 \pm 8$  h (range 5–24 h). No supplemental analgesia was required in any child. The upper level of analgesia was difficult to assess because the pinprick test was unreliable. Pruritus occurred in four of 20 children, with a mean onset of  $3 \pm 1$  h, was nonsegmental (occurring mainly on the head and trunk), and was never a discomfort for the child. Nausea and vomiting occurred in eight of 20 children, with a mean onset of  $6 \pm 2.2$  h. Urinary retention occurred in four out of 14 children without a bladder catheter; none of them required catheterization of the bladder. No patient had apnea, cyanosis, or an abnormally

slow respiratory rate. No complications resulted from the placement of the epidural catheter.

### PLASMA PHARMACOKINETICS

Arterial  $p\text{H}$  and blood gas tensions before epidural morphine injection were within normal limits for all patients ( $p\text{H} 7.38 \pm 0.02$ ). Figure 1 shows the mean time course of the plasma morphine concentration, and table 2 summarizes individual pharmacokinetic parameters and mean values  $\pm$  SD for the group.

### VENTILATORY CONTROL

The results are summarized in table 3. Resting RR,  $V_T$ ,  $\dot{V}_E$ , and  $\text{PET}_{\text{CO}_2}$  did not change significantly during the study. All of the  $\text{CO}_2$  response curves were linear, with a correlation coefficient ( $r$ ) ranging between 0.92 and 0.98. After surgery, and before epidural morphine, the slope  $\dot{V}_E/\text{PET}_{\text{CO}_2}$  and  $\dot{V}_E/55$  were significantly less than the values obtained the day before the surgery, except for the  $\dot{V}_E/55$  at 22 h after epidural morphine injection; however, epidural morphine administration was not associated with further depression of ventilatory control at any time during the 22-h measurement period.

### Discussion

Epidural morphine provides effective and prolonged analgesia in postoperative patients following abdominal and urologic surgery. Although they received no opioids during surgery, none of the children required systemic analgesia during the first postoperative day. The major advantage of this method is the consistent analgesia achieved in contrast to the varying degree of analgesia observed with intermittent intramuscular or subcutaneous narcotic injections. The latency of onset and the individual variability of the duration of analgesia is similar to that observed previously reported in adult<sup>2</sup> and pediatric<sup>3</sup> patients. When analgesia from epidural morphine decreased, our standard analgesia therapy was continued. The fre-

TABLE 2. Pharmacokinetic Parameters of Each Child and Mean Values  $\pm$  SD for the Group after Epidural Morphine ( $50 \mu\text{g} \cdot \text{kg}^{-1}$ )

| Patient       | Weight (kg)     | Age (yr)      | $T_{\text{max}}$ (min) | $C_{\text{max}}$ ( $\text{ng} \cdot \text{ml}^{-1}$ ) | $T_{1/2\beta}$ (min) | $V\beta$ ( $\text{l} \cdot \text{kg}^{-1}$ ) | Clt ( $\text{ml} \cdot \text{min}^{-1} \cdot \text{kg}^{-1}$ ) | AUC ( $\text{ng} \cdot \text{min}^{-1} \cdot \text{ml}^{-1}$ ) |
|---------------|-----------------|---------------|------------------------|-------------------------------------------------------|----------------------|----------------------------------------------|----------------------------------------------------------------|----------------------------------------------------------------|
| 1             | 15              | 5             | 10.7                   | 13.1                                                  | 74.2                 | 3.42                                         | 31.9                                                           | 1190                                                           |
| 2             | 18.4            | 4.5           | 10                     | 19.6                                                  | 77.0                 | 3.45                                         | 31.0                                                           | 1222                                                           |
| 3             | 22.2            | 6             | 10.2                   | 34                                                    | 69.8                 | 2.51                                         | 24.9                                                           | 1509                                                           |
| 4             | 22.2            | 7.5           | 10.2                   | 33.6                                                  | 54.2                 | 2.10                                         | 26.9                                                           | 1398                                                           |
| 5             | 30              | 12            | 10                     | 39                                                    | 65.2                 | 2.36                                         | 24.9                                                           | 1524                                                           |
| 6             | 41              | 14            | 10.7                   | 23                                                    | 70.7                 | 2.05                                         | 24.5                                                           | 1511                                                           |
| 7             | 54              | 15            | 10                     | 24.9                                                  | 104.7                | 4.69                                         | 31                                                             | 1244                                                           |
| Mean $\pm$ SD | $29.0 \pm 13.8$ | $9.1 \pm 4.4$ | $10.3 \pm 0.3$         | $26.7 \pm 9.1$                                        | $73.8 \pm 41.6$      | $2.94 \pm 0.93$                              | $28.3 \pm 3.4$                                                 | $1371 \pm 148$                                                 |

See text for abbreviations.

TABLE 3. Respiratory Variables the Day before the Surgery, before and after Epidural Morphine (50 µg/kg)

|                                                                                                   | Preoperative Values | Before Epidural Morphine | Postoperative Period    |              |              |              |
|---------------------------------------------------------------------------------------------------|---------------------|--------------------------|-------------------------|--------------|--------------|--------------|
|                                                                                                   |                     |                          | After Epidural Morphine |              |              |              |
|                                                                                                   |                     |                          | 3 h                     | 6 h          | 10 h         | 22 h         |
| Resting RR (breaths/min)                                                                          | 25.1 ± 6.2          | 21.2 ± 5.7               | 25.0 ± 4.9              | 23.3 ± 4.9   | 23.5 ± 7.3   | 25.7 ± 7.8   |
| Resting V <sub>T</sub> (ml · kg <sup>-1</sup> )                                                   | 8.6 ± 2.5           | 6.5 ± 2.7                | 7.3 ± 2.2               | 6.0 ± 1.2    | 6.7 ± 2.4    | 7.5 ± 2.2    |
| Resting V <sub>E</sub> (ml · kg <sup>-1</sup> · min <sup>-1</sup> )                               | 187 ± 42            | 133 ± 49                 | 168 ± 32                | 155 ± 16     | 135 ± 42     | 164 ± 32     |
| Resting PET <sub>CO<sub>2</sub></sub> (mmHg)                                                      | 38.3 ± 5.4          | 42.1 ± 5.2               | 42.3 ± 6.5              | 43.0 ± 7.5   | 43.8 ± 6.0   | 0.7 ± 6.7    |
| Slope V <sub>E</sub> /PET <sub>CO<sub>2</sub></sub> (l · min <sup>-1</sup> · mmHg <sup>-1</sup> ) | 1.51 ± 0.72         | 0.84 ± 0.44*             | 0.62 ± 0.21*            | 0.77 ± 0.26* | 0.73 ± 0.33* | 0.90 ± 0.57* |
| V <sub>E</sub> 55 (l · min <sup>-1</sup> )                                                        | 18.6 ± 8.6          | 10.6 ± 4.7*              | 9.2 ± 3.1*              | 9.5 ± 6.5*   | 10.7 ± 4.7*  | 15.1 ± 5.7   |

Values are mean ± SD.  
RR = respiratory frequency; VT = tidal volume; VE = minute ventilation; PET<sub>CO<sub>2</sub></sub> = end-tidal tension CO<sub>2</sub>; VE 55 = minute ventilation

at PET<sub>CO<sub>2</sub></sub> 55 mmHg.  
\* P < 0.05 statistical significance from preoperative values.

quency of nonrespiratory side effects was similar to that previously reported in adults.<sup>11</sup> Urinary retention was the most disturbing side effect, occurring in 30% of the patients who did not have a catheter inserted preoperatively.

The pharmacokinetic study employed an RIA method that may suffer from a lack of specificity.<sup>10</sup> Of the specific RIA methods reported,<sup>10,12</sup> the most specific uses antiserum against N-carboxymethylmorphine.<sup>10,12,13</sup> The specificity of our antiserum is very high as proved by the study of cross-reactivity according to Abraham's definition.<sup>14</sup> Morphine was rapidly absorbed from the epidural space, which is in agreement with previous studies in adults.<sup>8,9</sup> The average terminal half-life of morphine in our patients was shorter than reported in adults<sup>9</sup> and similar to that reported after intravenous administration in children.<sup>15</sup> The shorter half-life in children may be because of their greater total body clearance compared with adults.<sup>9</sup> This greater total body clearance may be related to increased hepatic mass relative to body weight or to an absolute increase in hepatic microsomal activity.<sup>16</sup> These mechanisms have been previously invoked to explain accelerated elimination of other drugs in children, such as theophylline<sup>17</sup> and thiopental<sup>18</sup> in children. Our pharmacokinetic data suggest two arguments in favor of a nonsystemic analgesic effect of epidural morphine in children: 1) the long duration of analgesia was similar to that observed in adults, despite a shorter plasma half-life of epidural morphine in children; and 2) the effective analgesia observed 1 h after epidural morphine was concomitant with a plasma morphine level always less than 12 ng · ml<sup>-1</sup> (fig. 1), a level considered necessary for systemic analgesia in children.<sup>19</sup>

We did not observe apnea after epidural morphine in the 20 children studied. However, both slope V<sub>E</sub>/PET<sub>CO<sub>2</sub></sub> and V<sub>E</sub> 55 decreased postoperatively from their preoperative values and remained depressed for 22 and 10 h, respectively. First, the relatively high respiratory variables values can be the result of the anxiety of the

children. The decrease in the ventilatory response to CO<sub>2</sub> after surgery and before epidural morphine may be due to the residual effect of anesthetic drugs such as diazepam<sup>20</sup> or isoflurane,<sup>21</sup> or to the site of surgery and to the pain. However Bedford and Wollman<sup>22</sup> and Clergue *et al.*<sup>23</sup> have shown that 24 h after cardiac and upper abdominal surgery, respectively, the ventilatory response to CO<sub>2</sub> was not affected by surgery, and the response to airway of occlusion during CO<sub>2</sub> breathing was increased.<sup>23</sup> Therefore, following epidural morphine the failure of the ventilatory response to CO<sub>2</sub> to return to its control value was probably due to the respiratory depression induced by epidural morphine. Depression of ventilation has been reported after epidural morphine in adults<sup>6,24</sup> and is probably due to the rostral spread of morphine into the CSF.<sup>7</sup> The delayed occurrence of side effects such as pruritus and nausea have been considered as additional arguments in favor of this hypothesis.<sup>11</sup>

In conclusion, epidural morphine provides prompt, effective, and prolonged analgesia after abdominal and urologic surgery in children; this is not primarily a systemic effect of the drug. Delayed nonrespiratory side effects occur in a significant fraction of the patients. Additionally, the ventilatory response to CO<sub>2</sub> remains depressed for at least 22 h, indicating that pediatric patients should be closely monitored (measurement of respiratory rate by impedance pneumography or oxygen saturation by pulse oximetry) for the first postoperative day in an intensive care unit.

The authors thank G. Rosine for secretarial assistance.

### References

- Behar M, Magora F, Olshwang D, Davidson JT: Epidural morphine in treatment of pain. *Lancet* 1:527-529, 1979
- Bromage PR, Camporesi E, Chestnut D: Epidural narcotics for postoperative analgesia. *Anesth Analg* 59:473-480, 1980
- Jensen BH: Caudal block for postoperative pain relief in children

- after genital operation: A comparison between bupivacaine and morphine. *Acta Anaesthesiol Scand* 25:373-375, 1981
4. Shapiro LA, Jedeikin RJ, Shalev D: Epidural morphine in children. *ANESTHESIOLOGY* 61:210-212, 1984
  5. Glenski JA, Warner MA, Dawson B, Kaufman B: Postoperative use of epidurally administered morphine in children and adolescents. *Mayo Clin Proc* 59:530-533, 1984
  6. Camporesi EM, Nielsen CH, Bromage PR, Durant PA: Ventilatory CO<sub>2</sub> sensitivity after intravenous and epidural morphine in volunteers. *Anesth Analg* 62:633-640, 1983
  7. Bromage PR, Camporesi EM, Durant PAC, Nielsen CH: Rostral spread of epidural morphine. *ANESTHESIOLOGY* 56:431-436, 1982
  8. Chauvin M, Samii K, Schermann JM, Sandouk P, Bourdon R, Viars P: Plasma pharmacokinetics of morphine after IM, extradural and intrathecal administration. *Br J Anaesth* 54:843-847, 1982
  9. Nordberg G, Hedner T, Mellstrand T: Pharmacokinetics aspects of epidural morphine analgesia. *ANESTHESIOLOGY* 58:545-551, 1983
  10. Gintzler A, Morhacsi E, Spector S: Radioimmunoassay for the simultaneous determination of morphine and codeine. *Eur J Pharmacol* 38:149-156, 1976
  11. Bromage PR, Camporesi EM, Durant PAC, Nielsen CH: Non-respiratory side effects of epidural morphine. *Anesth Analg* 61:490-495, 1982
  12. Finolay JWA, Butz RF, Jones EC: Relationships between immunogen structure and antisera specificity in the narcotic alkaloid series. *Clin Chem* 27:1524-1535, 1981
  13. Grabinski PY, Kaiko RF, Walsh TD, Foley KM, Houde RW: Morphine radioimmunoassay specificity before and after extraction of plasma and cerebrospinal fluid. *J Pharm Sci* 72:27-30, 1983
  14. Abraham GE: Solid phase radioimmunoassay of oestradiol. *J Clin Endocrinol Metab* 29:866-886, 1969
  15. Dahlstrom B, Bolme P, Feychting H, Noack G, Paalzow L: Morphine kinetics in children. *Clin Pharmacol Ther* 26:354-365, 1979
  16. Udkow G: Pediatric clinical pharmacology. *Am J Dis Child* 132:1025-1032, 1978
  17. Loughnan PM, Sitar DS, Ogilvie RI: Pharmacokinetic analysis of disposition of intravenous theophylline in young children *J Pediatr* 88:874-879, 1976
  18. Sorbo S, Hudson RJ, Loomis JC: The pharmacokinetics of thiopental in pediatric surgical patients. *ANESTHESIOLOGY* 61:666-670, 1984
  19. Lynn AM, Ophem KE, Tyler DC: Morphine infusion after pediatric cardiac surgery. *Crit Care Med* 12:863-866, 1984
  20. Clergue F, Desmonts JM, Duvaldestin P, Delavault E, Saumon G: Depression of respiratory drive by diazepam as premedication. *Br J Anaesth* 53:1059-1063, 1981
  21. Fourcade HE, Stevens WC, Larson CP Jr, Cromwell TH, Bahlman SH, Mickey RF, Malsey MJ, Eger EI II: The ventilatory effects of Forane®, a new inhaled anesthetic. *ANESTHESIOLOGY* 35:26-31, 1971
  22. Bedford RF, Wollman H: Postoperative respiratory effects of morphine and halothane anesthesia. A study in patients undergoing cardiac surgery. *ANESTHESIOLOGY* 43:1-9, 1975
  23. Clergue F, Montebault C, Despierres O, Ghesquiere F, Harari A, Viars P: Respiratory effects of intrathecal morphine after upper abdominal surgery. *ANESTHESIOLOGY* 61:677-685, 1984
  24. Rawal N, Wattwil M: Respiratory depression after epidural morphine: An experimental and clinical study. *Anesth Analg* 63:8-14, 1984
